# Supplementary material for: Bayesian spatio-temporal modeling of mortality in relation to malaria incidence in Western Kenya
Source: PLoS One. 2017 Jul 13;12(7):e0180516. doi: 10.1371/journal.pone.0180516 (PMC5509217; doi:10.1371/journal.pone.0180516)
Supplement: S3 File — (XLSX) [file pone.0180516.s003.xlsx]

## Sheet: All
	All
	interv4_c1	Freq.	Percent	Cum.
	01.01 Sepsis (non-obstetric)	13	0.08	0.08
	01.02 Acute resp infect incl pneumonia	1805	10.61	10.68
	01.03 HIV/AIDS related death	3301	19.4	30.08
	01.04 Diarrhoeal diseases	506	2.97	33.06
	01.05 Malaria	2606	15.31	48.37
	01.06 Measles	113	0.66	49.04
	01.07 Meningitis and encephalitis	172	1.01	50.05
	01.08 & 10.05 Tetanus	3	0.02	50.06
	01.09 Pulmonary tuberculosis	2321	13.64	63.7
	01.10 Pertussis	1	0.01	63.71
	01.11 Haemorrhagic fever	6	0.04	63.75
	01.99 Other and unspecified infect dis	84	0.49	64.24
	02.01 Oral neoplasms	14	0.08	64.32
	02.02 Digestive neoplasms	400	2.35	66.67
	02.03 Respiratory neoplasms	652	3.83	70.5
	02.04 Breast neoplasms	14	0.08	70.59
	02.05 & 02.06 Reproductive neoplasms MF	65	0.38	70.97
	02.99 Other and unspecified neoplasms	452	2.66	73.62
	03.01 Severe anaemia	42	0.25	73.87
	03.02 Severe malnutrition	174	1.02	74.89
	03.03 Diabetes mellitus	101	0.59	75.49
	04.01 Acute cardiac disease	90	0.53	76.02
	04.02 Stroke	289	1.7	77.72
	04.03 Sickle cell with crisis	49	0.29	78
	04.99 Other and unspecified cardiac dis	821	4.82	82.83
	Chronic obstructive pulmonary dis	278	1.63	84.46
	05.02 Asthma	144	0.85	85.31
	06.01 Acute abdomen	605	3.56	88.86
	06.02 Liver cirrhosis	108	0.63	89.5
	07.01 Renal failure	86	0.51	90
	08.01 Epilepsy	51	0.3	90.3
	09.02 Abortion-related death	5	0.03	90.33
	09.03 Pregnancy-induced hypertension	5	0.03	90.36
	09.04 Obstetric haemorrhage	37	0.22	90.58
	09.06 Pregnancy-related sepsis	8	0.05	90.63
	09.07 Anaemia of pregnancy	9	0.05	90.68
	09.99 Other and unspecified maternal ..	6	0.04	90.71
	10.01 Prematurity	57	0.33	91.05
	10.02 Birth asphyxia	153	0.9	91.95
	10.03 Neonatal pneumonia	188	1.1	93.05
	10.04 Neonatal sepsis	82	0.48	93.54
	10.06 Congenital malformation	21	0.12	93.66
	10.99 Other and unspecified neonatal ..	79	0.46	94.12
	11.01 Fresh stillbirth	79	0.46	94.59
	11.02 Macerated stillbirth	41	0.24	94.83
	12.01 Road traffic accident	128	0.75	95.58
	12.03 Accid fall	43	0.25	95.83
	12.04 Accid drowning and submersion	71	0.42	96.25
	12.05 Accid expos to smoke fire & flame	40	0.24	96.49
	12.06 Contact with venomous plant/ani..	11	0.06	96.55
	12.07 Accid poisoning & noxious subs	8	0.05	96.6
	12.08 Intentional self-harm	53	0.31	96.91
	12.09 Assault	205	1.2	98.11
	12.10 Exposure to force of nature	7	0.04	98.15
	12.99 Other and unspecified external ..	30	0.18	98.33
	98 Other and unspecified NCD	284	1.67	100

## Sheet: Neonates
	Neonates
	01.02 Acute resp infect incl pneumonia	9	1.56522	1.56522			Cause of death	Numbers	Percent
	01.03 HIV/AIDS related death	3	0.521739	2.08696			Neonatal pneumonia	169	0.293913
	01.04 Diarrhoeal diseases	3	0.521739	2.6087			Birth asphyxia	145	0.252174
	01.05 Malaria	9	1.56522	4.17391			Neonatal sepsis	79	0.137391
	01.07 Meningitis and encephalitis	16	2.78261	6.95652			Prematurity	53	0.0921739
	04.03 Sickle cell with crisis	1	0.173913	7.13043			Meningitis and encephalitis	16	0.0278261
	06.01 Acute abdomen	2	0.347826	7.47826			Others	113	0.196522
	10.01 Prematurity	53	9.21739	16.6957
	10.02 Birth asphyxia	145	25.2174	41.913
	10.03 Neonatal pneumonia	169	29.3913	71.3043
	10.04 Neonatal sepsis	79	13.7391	85.0435
	10.06 Congenital malformation	10	1.73913	86.7826
	10.99 Other and unspecified neonatal ..	76	13.2174	100
								575

## Sheet: Infants
	Infants
	01.01 Sepsis (non-obstetric)	5	0.23	0.23			Cause of death	Numbers	Percent
	01.02 Acute resp infect incl pneumonia	739	34.09	34.32			Acute respiratory infection/pneumonia	739	0.340867
	01.03 HIV/AIDS related death	277	12.78	47.09			Malaria	672	0.309963
	01.04 Diarrhoeal diseases	209	9.64	56.73			HIV/AIDS	277	0.127768
	01.05 Malaria	672	31	87.73			Diarrhoeal diseases	209	0.0964022
	01.06 Measles	56	2.58	90.31			Measles	56	0.0258303
	01.07 Meningitis and encephalitis	48	2.21	92.53			Others	215	0.0991697
	01.08 & 10.05 Tetanus	2	0.09	92.62
	01.99 Other and unspecified infect dis	3	0.14	92.76
	03.02 Severe malnutrition	20	0.92	93.68
	04.03 Sickle cell with crisis	13	0.6	94.28
	06.01 Acute abdomen	61	2.81	97.09
	08.01 Epilepsy	2	0.09	97.19
	10.01 Prematurity	3	0.14	97.32
	10.02 Birth asphyxia	7	0.32	97.65
	10.03 Neonatal pneumonia	15	0.69	98.34
	10.04 Neonatal sepsis	3	0.14	98.48
	10.06 Congenital malformation	11	0.51	98.99
	10.99 Other and unspecified neonatal ..	1	0.05	99.03
	11.02 Macerated stillbirth	1	0.05	99.08
	12.01 Road traffic accident	1	0.05	99.12
	12.03 Accid fall	1	0.05	99.17
	12.04 Accid drowning and submersion	2	0.09	99.26
	12.05 Accid expos to smoke fire & flame	8	0.37	99.63
	12.06 Contact with venomous plant/ani..	2	0.09	99.72
	12.09 Assault	1	0.05	99.77
	12.99 Other and unspecified external ..	5	0.23	100
								2168

## Sheet: Child
	Child
	01.01 Sepsis (non-obstetric)	3	0.11	0.11
	01.02 Acute resp infect incl pneumonia	272	9.97	10.08				Malaria	1162	0.425797
	01.03 HIV/AIDS related death	686	25.14	35.21				HIV/AIDS	686	0.251374
	01.04 Diarrhoeal diseases	195	7.15	42.36				Acute respiratory infection/pneumonia	272	0.0996702
	01.05 Malaria	1162	42.58	84.94				Diarrhoeal diseases	195	0.0714547
	01.06 Measles	55	2.02	86.95				Severe malnutrition	107	0.0392085
	01.07 Meningitis and encephalitis	15	0.55	87.5				Others	307	0.112495
	01.09 Pulmonary tuberculosis	17	0.62	88.13					2729
	01.10 Pertussis	1	0.04	88.16
	01.11 Haemorrhagic fever	2	0.07	88.24
	01.99 Other and unspecified infect dis	10	0.37	88.6
	02.02 Digestive neoplasms	1	0.04	88.64
	02.99 Other and unspecified neoplasms	1	0.04	88.68
	03.01 Severe anaemia	4	0.15	88.82
	03.02 Severe malnutrition	107	3.92	92.74
	03.03 Diabetes mellitus	2	0.07	92.82
	04.02 Stroke	1	0.04	92.85
	04.03 Sickle cell with crisis	20	0.73	93.59
	05.02 Asthma	3	0.11	93.7
	06.01 Acute abdomen	88	3.22	96.92
	06.02 Liver cirrhosis	16	0.59	97.51
	07.01 Renal failure	4	0.15	97.65
	08.01 Epilepsy	1	0.04	97.69
	10.01 Prematurity	1	0.04	97.73
	10.02 Birth asphyxia	1	0.04	97.76
	10.03 Neonatal pneumonia	4	0.15	97.91
	10.99 Other and unspecified neonatal ..	1	0.04	97.95
	12.01 Road traffic accident	3	0.11	98.06
	12.03 Accid fall	3	0.11	98.17
	12.04 Accid drowning and submersion	24	0.88	99.05
	12.05 Accid expos to smoke fire & flame	12	0.44	99.49
	12.06 Contact with venomous plant/ani..	4	0.15	99.63
	12.07 Accid poisoning & noxious subs	2	0.07	99.71
	12.09 Assault	7	0.26	99.96
	12.99 Other and unspecified external ..	1	0.04	100

## Sheet: Older child
	Older Child
	01.02 Acute resp infect incl pneumonia	68	9.74	9.74				Cause of death	Numbers	Percent
	01.03 HIV/AIDS related death	135	19.34	29.08				Malaria	233	0.333811
	01.04 Diarrhoeal diseases	13	1.86	30.95				HIV/AIDS	135	0.19341
	01.05 Malaria	233	33.38	64.33				Acute respiratory infection/pneumonia	68	0.0974212
	01.06 Measles	2	0.29	64.61				Accidents/Injuries	56	0.0802292
	01.07 Meningitis and encephalitis	6	0.86	65.47				Pulmonary tuberculosis	32	0.0458453
	01.09 Pulmonary tuberculosis	32	4.58	70.06				Others	174	0.249284
	01.11 Haemorrhagic fever	2	0.29	70.34					698
	01.99 Other and unspecified infect dis	18	2.58	72.92
	02.99 Other and unspecified neoplasms	8	1.15	74.07
	03.01 Severe anaemia	4	0.57	74.64
	03.02 Severe malnutrition	12	1.72	76.36
	03.03 Diabetes mellitus	2	0.29	76.65
	04.02 Stroke	1	0.14	76.79
	04.03 Sickle cell with crisis	14	2.01	78.8
	04.99 Other and unspecified cardiac dis	7	1	79.8
	05.02 Asthma	5	0.72	80.52
	06.01 Acute abdomen	46	6.59	87.11
	06.02 Liver cirrhosis	21	3.01	90.11
	07.01 Renal failure	5	0.72	90.83
	08.01 Epilepsy	7	1	91.83
	12.01 Road traffic accident	21	3.01	94.84
	12.04 Accid drowning and submersion	16	2.29	97.13
	12.05 Accid expos to smoke fire & flame	6	0.86	97.99
	12.06 Contact with venomous plant/ani..	1	0.14	98.14
	12.08 Intentional self-harm	1	0.14	98.28
	12.09 Assault	5	0.72	99
	12.99 Other and unspecified external ..	6	0.86	99.86
	98 Other and unspecified NCD	1	0.14	100

## Sheet: Adults
	Adults
	01.01 Sepsis (non-obstetric)	2	0.03	0.03				Cause of death	Numbers	Percent
	01.02 Acute resp infect incl pneumonia	337	5.57	5.6				HIV/AIDS	1897	0.313398
	01.03 HIV/AIDS related death	1897	31.34	36.94				Pulmonary tuberculosis	1549	0.255906
	01.04 Diarrhoeal diseases	43	0.71	37.65				Neoplasms	566	0.0935074
	01.05 Malaria	321	5.3	42.95				Accidents/Injuries	359	0.0593094
	01.07 Meningitis and encephalitis	70	1.16	44.11				Malaria	321	0.0530316
	01.08 & 10.05 Tetanus	1	0.02	44.13				Others	1361	0.224847
	01.09 Pulmonary tuberculosis	1549	25.59	69.72					6053
	01.11 Haemorrhagic fever	2	0.03	69.75
	01.99 Other and unspecified infect dis	21	0.35	70.1
	02.01 Oral neoplasms	8	0.13	70.23
	02.02 Digestive neoplasms	148	2.45	72.67
	02.03 Respiratory neoplasms	214	3.54	76.21
	02.04 Breast neoplasms	11	0.18	76.39
	02.05 & 02.06 Reproductive neoplasms MF	26	0.43	76.82
	02.99 Other and unspecified neoplasms	159	2.63	79.45
	03.01 Severe anaemia	10	0.17	79.61
	03.02 Severe malnutrition	13	0.21	79.83
	03.03 Diabetes mellitus	17	0.28	80.11
	04.01 Acute cardiac disease	28	0.46	80.57
	04.02 Stroke	86	1.42	81.99
	04.03 Sickle cell with crisis	1	0.02	82.01
	04.99 Other and unspecified cardiac dis	188	3.11	85.11
	05.01 Chronic obstructive pulmonary dis	37	0.61	85.73
	05.02 Asthma	62	1.02	86.75
	06.01 Acute abdomen	198	3.27	90.02
	06.02 Liver cirrhosis	22	0.36	90.38
	07.01 Renal failure	11	0.18	90.57
	08.01 Epilepsy	39	0.64	91.21
	09.02 Abortion-related death	5	0.08	91.29
	09.03 Pregnancy-induced hypertension	5	0.08	91.38
	09.04 Obstetric haemorrhage	37	0.61	91.99
	09.06 Pregnancy-related sepsis	8	0.13	92.12
	09.07 Anaemia of pregnancy	9	0.15	92.27
	09.99 Other and unspecified maternal ..	6	0.1	92.37
	10.99 Other and unspecified neonatal ..	1	0.02	92.38
	11.02 Macerated stillbirth	1	0.02	92.4
	12.01 Road traffic accident	77	1.27	93.67
	12.03 Accid fall	10	0.17	93.84
	12.04 Accid drowning and submersion	27	0.45	94.28
	12.05 Accid expos to smoke fire & flame	11	0.18	94.47
	12.07 Accid poisoning & noxious subs	4	0.07	94.53
	12.08 Intentional self-harm	43	0.71	95.24
	12.09 Assault	174	2.87	98.12
	12.10 Exposure to force of nature	5	0.08	98.2
	12.99 Other and unspecified external ..	8	0.13	98.33
	98 Other and unspecified NCD	101	1.67	100

## Sheet: Elderly
	Elderly
	interv4_c1 Freq.	Percent	Cum.					Cause of death	Numbers	Percent
	01.01 Sepsis (non-obstetric)	3	0.06	0.06				Neoplasms	1021	0.218396
	Acute respiratory infection/pneumonia	380	8.13	8.19				Cardio-Vascular	889	0.19016
	01.03 HIV/AIDS related death	303	6.48	14.67				Pulmonary tuberculosis	723	0.154652
	01.04 Diarrhoeal diseases	43	0.92	15.59				Acute respiratory infection/pneumonia	380	0.0812834
	01.05 Malaria	209	4.47	20.06				Malaria	209	0.0447059
	01.07 Meningitis and encephalitis	17	0.36	20.43				Others	1453	0.310802
	01.09 Pulmonary tuberculosis	723	15.47	35.89					4675
	01.99 Other and unspecified infect dis	32	0.68	36.58
	02.01 Oral neoplasms	6	0.13	36.71
	02.02 Digestive neoplasms	251	5.37	42.07
	02.03 Respiratory neoplasms	438	9.37	51.44
	02.04 Breast neoplasms	3	0.06	51.51
	02.05 & 02.06 Reproductive neoplasms MF	39	0.83	52.34
	02.99 Other and unspecified neoplasms	284	6.07	58.42
	03.01 Severe anaemia	24	0.51	58.93
	03.02 Severe malnutrition	22	0.47	59.4
	03.03 Diabetes mellitus	80	1.71	61.11
	04.01 Acute cardiac disease	62	1.33	62.44
	04.02 Stroke	201	4.3	66.74
	04.99 Other and unspecified cardiac dis	626	13.39	80.13
	05.01 Chronic obstructive pulmonary dis	241	5.16	85.28
	05.02 Asthma	74	1.58	86.87
	06.01 Acute abdomen	210	4.49	91.36
	06.02 Liver cirrhosis	49	1.05	92.41
	07.01 Renal failure	66	1.41	93.82
	08.01 Epilepsy	2	0.04	93.86
	12.01 Road traffic accident	26	0.56	94.42
	12.03 Accid fall	29	0.62	95.04
	12.04 Accid drowning and submersion	2	0.04	95.08
	12.05 Accid expos to smoke fire & flame	3	0.06	95.14
	12.06 Contact with venomous plant/ani..	4	0.09	95.23
	12.07 Accid poisoning & noxious subs	2	0.04	95.27
	12.08 Intentional self-harm	9	0.19	95.47
	12.09 Assault	18	0.39	95.85
	12.10 Exposure to force of nature	2	0.04	95.89
	12.99 Other and unspecified external ..	10	0.21	96.11
	98 Other and unspecified NCD	182	3.89	100
